# Supplementary material for: Microwave-assisted rapid preparation of hollow carbon nanospheres@TiN nanoparticles for lithium–sulfur batteries
Source: Royal Society of Chemistry journal article supplement (doi:10.1039/c8dt04095h), 2018-01-01
Supplement: c8dt04095h1.pdf [file c8dt04095h1.pdf]

## Supporting Information

### **Microwave-assisted rapid preparation of hollow carbon nanospheres@TiN nanoparticles for Lithium-Sulfur batteries**

Jianxin Tu,<sup>a</sup> Hejun Li,<sup>a</sup> Jizhao Zou,<sup>\*b</sup> Shaozhong Zeng,<sup>b</sup> Qi Zhang,<sup>c</sup>

Liang Yu<sup>b</sup> and Xierong Zeng<sup>\*b</sup>

<sup>a</sup> State Key Laboratory of Solidification Processing, Carbon/Carbon Composites  
Research Center, Northwestern Polytechnical University, Xi'an 710072, China

<sup>b</sup> Shenzhen Key Laboratory of Special Functional Materials & Shenzhen Engineering  
Laboratory for Advance Technology of ceramics, College of Materials Science and  
Engineering, Shenzhen University, Shenzhen 518060, PR China

<sup>c</sup> School of Aerospace, Transport and Manufacturing, Cranfield University, Cranfield,  
UK

\*Corresponding author.

E-mail: [zoujizhao@szu.edu.cn](mailto:zoujizhao@szu.edu.cn); [zengxier@szu.edu.cn](mailto:zengxier@szu.edu.cn)

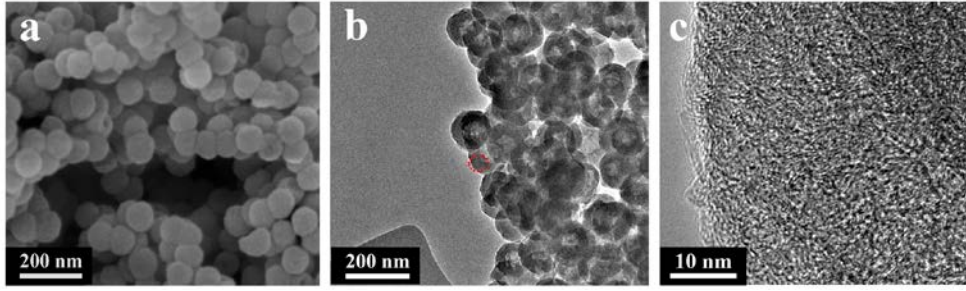

Fig. S1 (a) SEM image and (b, c) TEM images of HCNs.

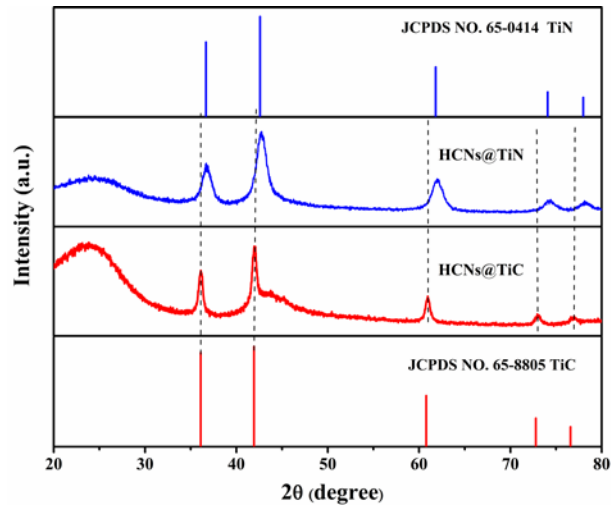

Fig. S2 XRD pattern of HCNs@TiN and HCNs@TiC

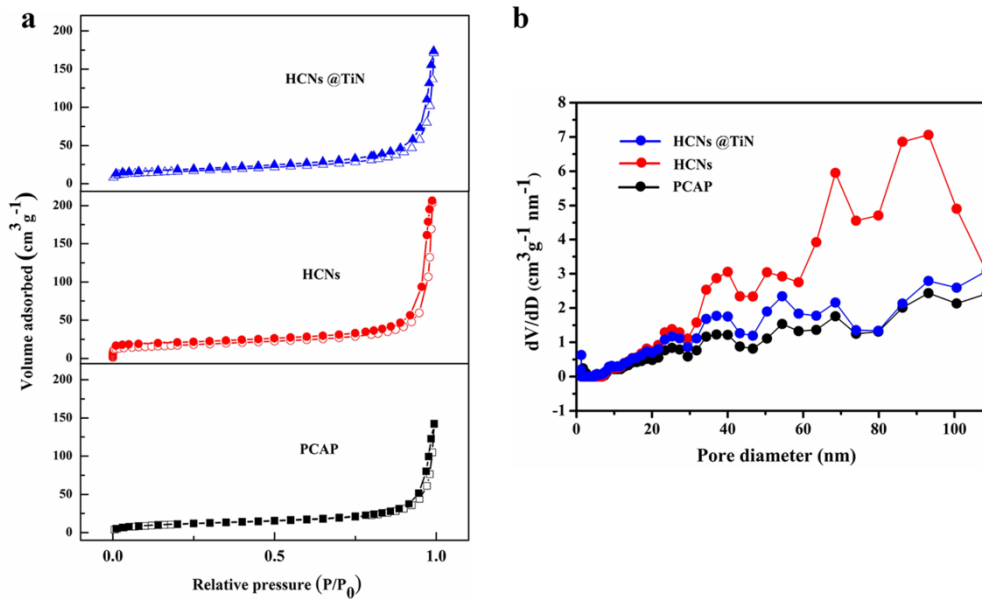

Fig. S3 (a)  $N_2$  adsorption/desorption isotherms and (b) corresponding pore size distributions of PCAP, HCNs and HCNs@TiN.

Table S1

Surface area and pore volume of PCAP, HCNs and HCNs@TiN.

| Specimen | $S_{\text{BET}}$<br>( $\text{m}^2 \text{g}^{-1}$ ) | $V_{\text{total}}$<br>( $\text{cm}^3 \text{g}^{-1}$ ) |
|----------|----------------------------------------------------|-------------------------------------------------------|
| PACP     | 39.4                                               | 0.16                                                  |
| HCNs     | 58.6                                               | 0.26                                                  |
| HCNs@TiN | 54.9                                               | 0.20                                                  |

Table S2.

Electrochemical performance of sulfur cathodes based on HCNs@TiN compared with other representative sulfur cathode based on porous carbon materials in the literatures.<sup>15, 32, 44-46</sup>

| Sulfur hosts<br>(morphology)                      | Sulfur content<br>( $\text{mg cm}^{-2}$ ) | Current rate<br>(C) | Cycle<br>number | Initial Capacity<br>( $\text{mAh g}^{-1}$ ) | Capacity<br>retention<br>(%) | Ref.         |
|---------------------------------------------------|-------------------------------------------|---------------------|-----------------|---------------------------------------------|------------------------------|--------------|
| Hollow carbon<br>nanospheres@TiN                  | 1.2                                       | 0.1                 | 200             | 1098                                        | 74                           | This<br>work |
| Hollow carbon<br>nanosphere                       | 1.5-2.0                                   | 0.2                 | 200             | 1401                                        | 44.7                         | 15           |
| Hollow carbon<br>nanosphere/polymer               | 1.0                                       | 0.1                 | 500             | 1430                                        | 31                           | 32           |
| Graphene/hollow<br>carbon sphere                  | 1.3-1.7                                   | 1                   | 200             | 832                                         | 69.1                         | 44           |
| TiO/hollow carbon<br>sphere                       | 1.5                                       | 0.5                 | 500             | 1066                                        | 59.1                         | 45           |
| $\text{Ti}_3\text{C}_2\text{T}_x$ @Meso<br>carbon | 2                                         | 0.5                 | 300             | 1255.8                                      | 56.1                         | 46           |
